# Supplementary material for: A novel COOH–GO–COOH–MWNT/pDA/AuNPs based electrochemical aptasensor for detection of AFB1
Source: Royal Society of Chemistry journal article supplement (doi:10.1039/d2ra03883h), 2022-01-01
Supplement: d2ra03883h1.pdf [file d2ra03883h1.pdf]

## **Electronic Supplementary Material**

### **A novel COOH-GO-COOH-MWNT/pDA/AuNPs based electrochemical aptasensor for detection of AFB1**

Pengfei Wang<sup>a,b,#</sup>, Bin Luo<sup>a,#</sup>, Ke Liu<sup>a</sup>, Cheng Wang<sup>a</sup>, Hongtu Dong<sup>a</sup>, Xiaodong Wang<sup>a</sup>, Peichen Hou<sup>a</sup>, Aixue Li<sup>a,b,\*</sup>

<sup>a</sup> Beijing Research Center of Intelligent Equipment for Agriculture, Beijing Academy of Agriculture and Forestry Sciences, Beijing 100097, China

<sup>b</sup> School of Agricultural Engineering, Jiangsu University, Jiangsu 212000, China

**Figure S1:** Optimization for the AFB1 sensor. **(A)** Time optimization for deposit gold nanoparticles, **(B)** cyclic number of polymeric dopamine, **(C)** SH-Apt concentration optimization and **(D)** dropping volume optimization of COOH-GO-COOH-MWNT nanocomposites, **(E)** potential optimization for deposit gold nanoparticles, **(F)** pH optimization for electrolyte, **(G)** ratio optimization for COOH-GO-COOH-MWNT nanocomposites, **(H)** concentration optimization for COOH-GO-COOH-MWNT nanocomposites.

**Figure S2:** The same sensor was measured 6 times.

**Figure S3:** Six electrode was measured under the same conditions.

**Figure S4:** The same electrode was measured continuously for two weeks.

**Table S1:** Performance comparison of electrochemical aptasensors for AFB1.

Figure S1

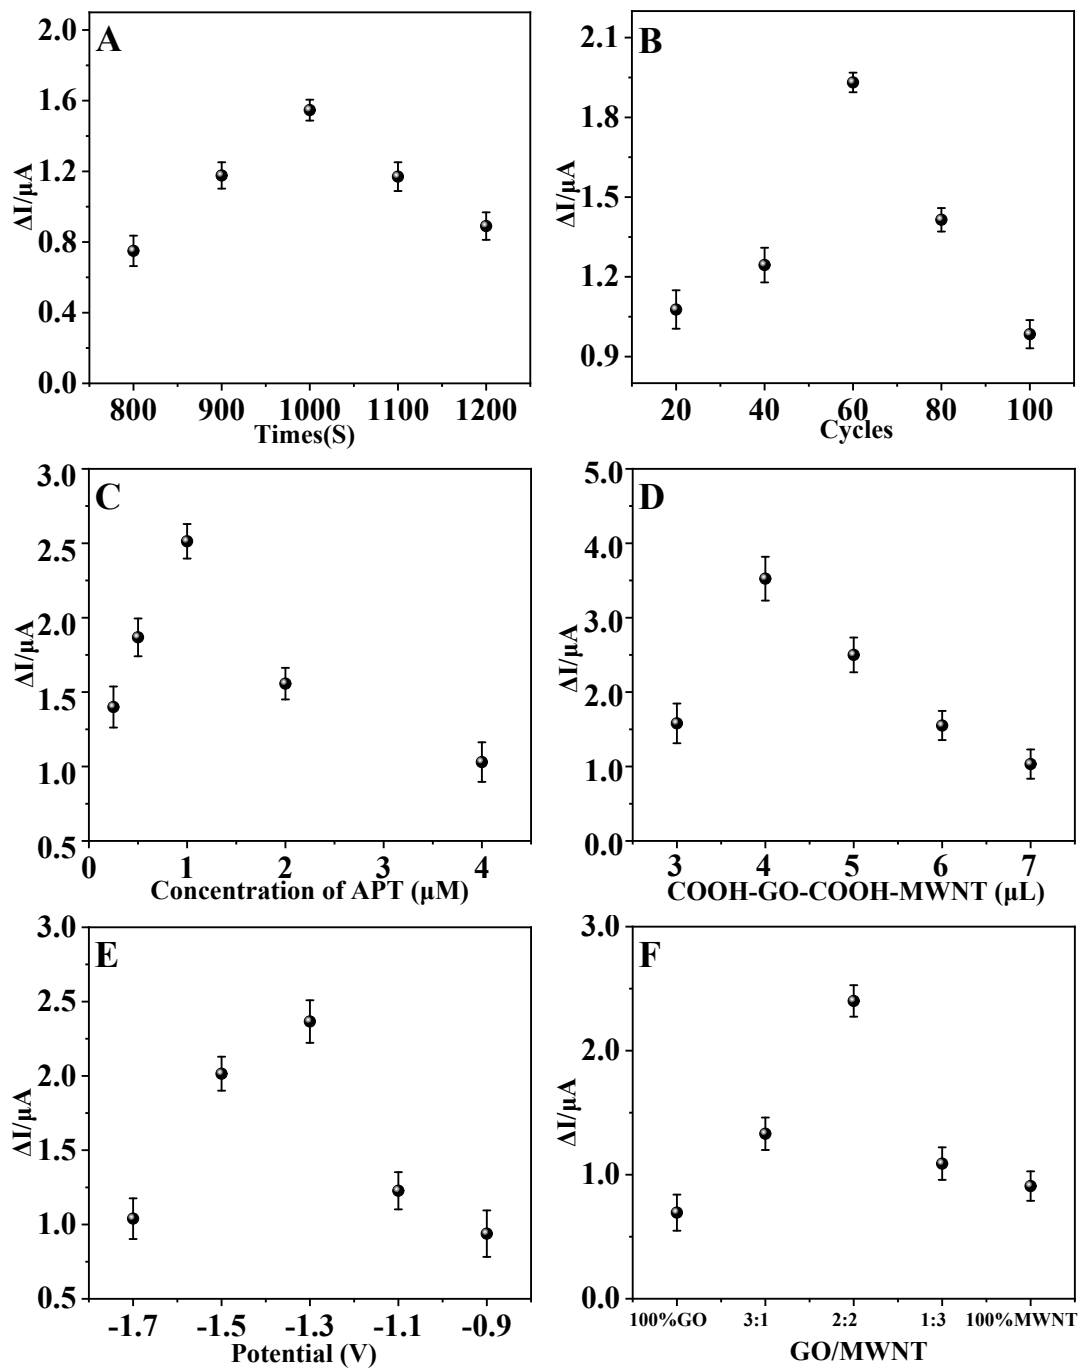

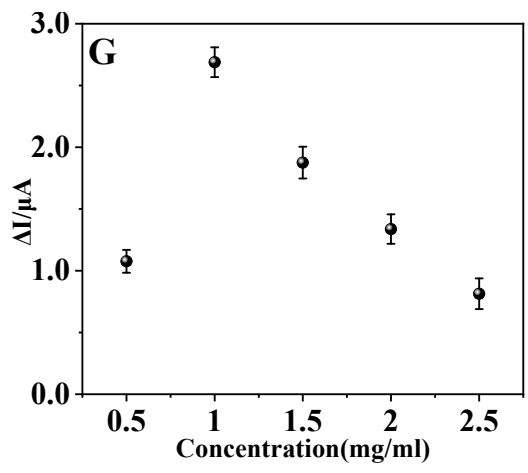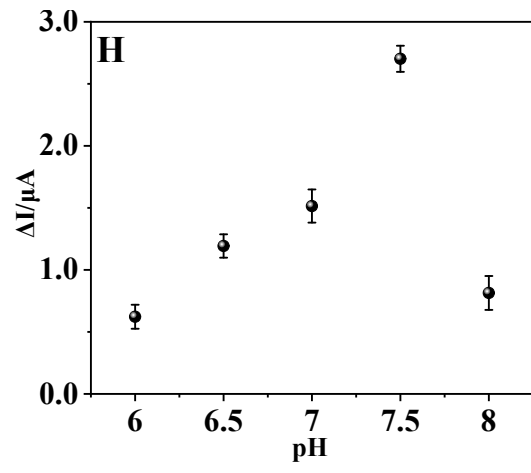

Figure S2

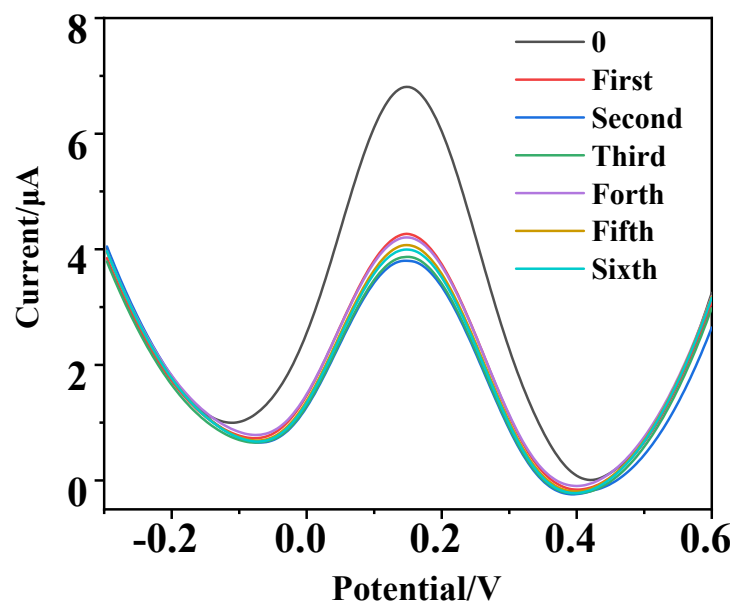

Figure S3

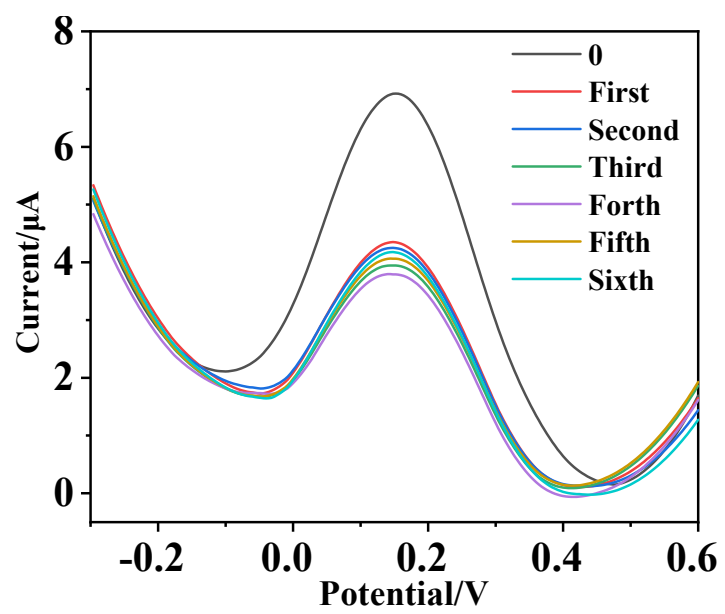

Figure S4

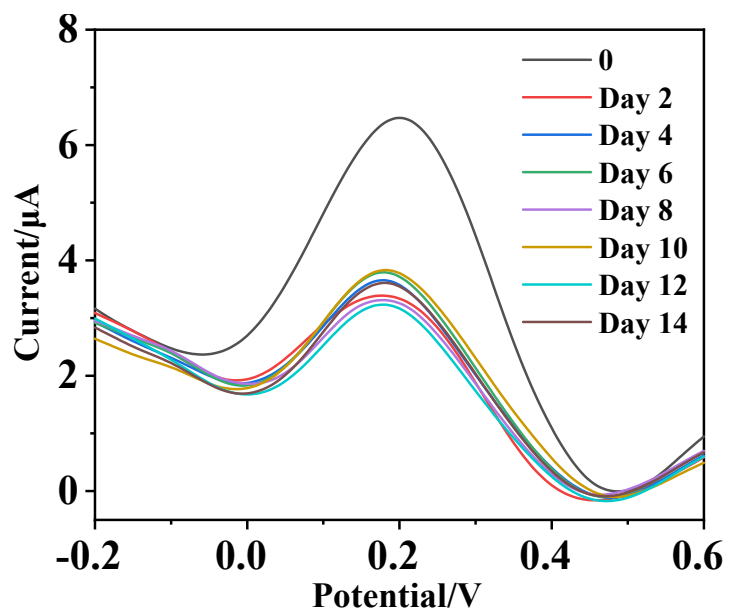

**Table S1**

| <b>Electrode</b>                            | <b>Method</b> | <b>Linear<br/>range(pg/ml)</b> | <b>LOD<br/>(pg/ml)</b> | <b>References</b> |
|---------------------------------------------|---------------|--------------------------------|------------------------|-------------------|
| MCH/Fc-Apt1/AQ-ssDNA<br>/AQ-hDNA/AuE        | ACV           | 10-3000                        | 4.3                    | 28                |
| Fc-Apt/Fc-aDNA/MCH/sDNA<br>/AuNPs/GCE       | ACV           | 0.1-10000                      | 0.012                  | 29                |
| MCH/Apt/RGO@MoS <sub>2</sub> @PANT<br>/GCE  | DPV           | 0.00001-0.001                  | 0.000002               | 30                |
| MCH/Apt/AuNPs/ZIF-8/GCE                     | DPV           | 10-100000                      | 1.82                   | 31                |
| Fc-Apt/MCH/sDNA/AuNPs<br>/THI-RGO/SPE       | ACV           | 50-20000                       | 16                     | 32                |
| MB/Fc/MCH/Apt/cDNA<br>/AuNPs/MPETS/ITO      | DPV           | 0.1-1000                       | 0.0032                 | 33                |
| Apt/AFB1-BSA/NHS/PANI-PAA<br>/GSPE          | DPV           | 100-10000                      | 86                     | 34                |
| MCH/Apt/AuNPs/pDA<br>/COOH-GO-COOH-MWNT/SPE | DPV           | 0.0001-100                     | 0.000015               | This work         |
